# Supplementary material
Source: HighWire-hosted journal article supplement (https://www.ajnr.org/highwire/filestream/60129/field_highwire_adjunct_files/0/17-01027.pdf)
Supplement: 17-01027.pdf [file 17-01027.pdf]

**On-line Table: Median (IQR) flow- and velocity-feature points**

| Parent Artery | CoW Configuration | Feature Point | Flow (mL/s) |            |           |         |           | Velocity (cm/s) |            |            |           |        |           |        |
|---------------|-------------------|---------------|-------------|------------|-----------|---------|-----------|-----------------|------------|------------|-----------|--------|-----------|--------|
|               |                   |               | Median (x)  | Median (y) | Q1 (x)    | Q1 (y)  | Q3 (x)    | Q3 (y)          | Median (x) | Median (y) | Q1 (x)    | Q1 (y) | Q3 (x)    | Q3 (y) |
| ICA           | Complete          | M             | -0.08271    | 1.9822     | -0.088917 | 1.488   | -0.069802 | 2.3167          | -0.084597  | 19.941     | -0.089768 | 18.026 | -0.071305 | 27.769 |
| ICA           | Complete          | S1            | -0.025683   | 2.7388     | -0.027828 | 2.3644  | -0.022464 | 3.167           | -0.025459  | 30.206     | -0.02801  | 25.184 | -0.022385 | 38.386 |
| ICA           | Complete          | S2            | 0           | 3.3760     | 0         | 3.1064  | 0         | 4.1339          | 0          | 39.453     | 0         | 30.82  | 0         | 47.586 |
| ICA           | Complete          | S3            | 0.024853    | 4.2419     | 0.023514  | 3.8132  | 0.02909   | 4.9296          | 0.025956   | 49.39      | 0.023416  | 36.536 | 0.03167   | 57.407 |
| ICA           | Complete          | P             | 0.086817    | 5.1591     | 0.075503  | 4.5306  | 0.16964   | 5.6824          | 0.089661   | 58.009     | 0.073307  | 42.282 | 0.16913   | 69.142 |
| ICA           | Complete          | D1            | 0.24115     | 4.2419     | 0.18489   | 3.8132  | 0.27101   | 4.9296          | 0.24172    | 49.39      | 0.19938   | 36.536 | 0.27314   | 57.407 |
| ICA           | Complete          | H             | 0.31407     | 3.3760     | 0.26254   | 3.1064  | 0.43121   | 4.1339          | 0.31265    | 39.453     | 0.25864   | 30.82  | 0.43976   | 47.586 |
| ICA           | Complete          | D2            | 0.46013     | 3.0793     | 0.38232   | 2.641   | 0.5558    | 3.7137          | 0.45876    | 33.334     | 0.37704   | 28.133 | 0.54551   | 42.774 |
| ICA           | Complete          | D3            | 0.60613     | 2.5406     | 0.49254   | 2.2667  | 0.67089   | 3.3071          | 0.60487    | 29.1       | 0.49017   | 24.972 | 0.64883   | 38.219 |
| ICA           | Complete          | D4            | 0.74271     | 2.2189     | 0.60578   | 2.0379  | 0.76437   | 2.7283          | 0.73543    | 25.367     | 0.60462   | 21.419 | 0.76124   | 36.021 |
| ICA           | Complete          | D5            | 0.85096     | 1.9831     | 0.71897   | 1.4897  | 0.90461   | 2.3175          | 0.85025    | 19.942     | 0.71806   | 18.028 | 0.90367   | 27.768 |
| ICA           | Incomplete        | M             | -0.084157   | 2.1206     | -0.085797 | 1.8756  | -0.077524 | 2.3559          | -0.085167  | 19.479     | -0.087639 | 17.258 | -0.077394 | 24.331 |
| ICA           | Incomplete        | S1            | -0.027067   | 3.1066     | -0.028029 | 2.6904  | -0.024855 | 3.2861          | -0.027136  | 30.806     | -0.028273 | 26.367 | -0.024716 | 31.641 |
| ICA           | Incomplete        | S2            | 0           | 3.9699     | 0         | 3.5782  | 0         | 4.4534          | 0          | 39.255     | 0         | 35.093 | 0         | 42.091 |
| ICA           | Incomplete        | S3            | 0.028809    | 4.8128     | 0.025698  | 4.4411  | 0.031683  | 5.6508          | 0.030113   | 46.656     | 0.025415  | 43.64  | 0.032988  | 53.506 |
| ICA           | Incomplete        | P             | 0.16762     | 5.6557     | 0.088665  | 5.2927  | 0.18637   | 6.8482          | 0.15276    | 54.057     | 0.0888    | 52.14  | 0.18266   | 64.92  |
| ICA           | Incomplete        | D1            | 0.25312     | 4.8128     | 0.24904   | 4.4411  | 0.26855   | 5.6508          | 0.26061    | 46.656     | 0.24509   | 43.64  | 0.26513   | 53.506 |
| ICA           | Incomplete        | H             | 0.34858     | 3.9699     | 0.30543   | 3.5782  | 0.43071   | 4.4534          | 0.3607     | 39.255     | 0.29732   | 35.093 | 0.42914   | 42.091 |
| ICA           | Incomplete        | D2            | 0.48659     | 3.4658     | 0.44317   | 3.0488  | 0.54258   | 3.5728          | 0.48041    | 35.444     | 0.43419   | 26.854 | 0.5452    | 36.477 |
| ICA           | Incomplete        | D3            | 0.62341     | 2.9835     | 0.55349   | 2.4481  | 0.66558   | 3.0995          | 0.61894    | 28.282     | 0.5469    | 23.706 | 0.66747   | 31.312 |
| ICA           | Incomplete        | D4            | 0.7786      | 2.6604     | 0.65723   | 2.3357  | 0.79359   | 2.9805          | 0.7791     | 24.736     | 0.6532    | 22.517 | 0.79372   | 28.813 |
| ICA           | Incomplete        | D5            | 0.89039     | 2.1211     | 0.76096   | 1.8779  | 0.93713   | 2.3565          | 0.89087    | 19.484     | 0.7595    | 17.269 | 0.93504   | 24.335 |
| MCA           | Complete          | M             | -0.081309   | 1.2774     | -0.098791 | 1.0023  | -0.066876 | 1.5559          | -0.079615  | 28.348     | -0.098356 | 21.014 | -0.068007 | 32.606 |
| MCA           | Complete          | S1            | -0.025848   | 1.7875     | -0.031407 | 1.3434  | -0.021583 | 2.0304          | -0.02586   | 37.576     | -0.03145  | 29.355 | -0.02159  | 41.164 |
| MCA           | Complete          | S2            | 0           | 2.2323     | 0         | 1.7601  | 0         | 2.4059          | 0          | 44.455     | 0         | 36.863 | 0         | 50.247 |
| MCA           | Complete          | S3            | 0.027103    | 2.5526     | 0.021831  | 2.146   | 0.034695  | 2.9167          | 0.027545   | 51.941     | 0.022158  | 45.899 | 0.034527  | 58.053 |
| MCA           | Complete          | P             | 0.10739     | 2.9139     | 0.07322   | 2.5043  | 0.16332   | 3.4302          | 0.11023    | 60.766     | 0.07498   | 51.738 | 0.17202   | 66.977 |
| MCA           | Complete          | D1            | 0.21577     | 2.5526     | 0.18893   | 2.146   | 0.23897   | 2.9167          | 0.21582    | 51.941     | 0.17981   | 45.899 | 0.23726   | 58.053 |
| MCA           | Complete          | H             | 0.29739     | 2.2323     | 0.25454   | 1.7601  | 0.37718   | 2.4059          | 0.28546    | 44.455     | 0.24973   | 36.863 | 0.38609   | 50.247 |
| MCA           | Complete          | D2            | 0.41836     | 2.0124     | 0.40104   | 1.6095  | 0.48063   | 2.1912          | 0.42135    | 39.375     | 0.39635   | 34.557 | 0.48131   | 44.335 |
| MCA           | Complete          | D3            | 0.54563     | 1.823      | 0.51608   | 1.3213  | 0.59152   | 2.1619          | 0.54427    | 37.217     | 0.5137    | 28.855 | 0.58749   | 40.841 |
| MCA           | Complete          | D4            | 0.63623     | 1.6089     | 0.59674   | 1.1787  | 0.73914   | 1.9094          | 0.63509    | 32.961     | 0.59446   | 25.206 | 0.73552   | 37.777 |
| MCA           | Complete          | D5            | 0.74936     | 1.296      | 0.69796   | 1.0025  | 0.87845   | 1.5549          | 0.74981    | 28.349     | 0.6971    | 21.021 | 0.8793    | 32.615 |
| MCA           | Incomplete        | M             | -0.090613   | 1.0703     | -0.11213  | 0.95046 | -0.077632 | 1.1442          | -0.09054   | 23.765     | -0.11406  | 20.853 | -0.077668 | 26.416 |
| MCA           | Incomplete        | S1            | -0.031202   | 1.5075     | -0.033971 | 1.3335  | -0.025546 | 1.6349          | -0.031094  | 33.37      | -0.034969 | 28.823 | -0.025964 | 34.597 |
| MCA           | Incomplete        | S2            | 0           | 1.9448     | 0         | 1.7165  | 0         | 2.1255          | 0          | 41.175     | 0         | 36.794 | 0         | 43.401 |
| MCA           | Incomplete        | S3            | 0.037717    | 2.3316     | 0.035189  | 2.0994  | 0.039505  | 2.4915          | 0.036408   | 48.426     | 0.034284  | 44.764 | 0.044532  | 53.315 |
| MCA           | Incomplete        | P             | 0.16139     | 2.6634     | 0.15083   | 2.4824  | 0.16388   | 2.9559          | 0.16043    | 56.939     | 0.15013   | 50.209 | 0.1641    | 63.229 |
| MCA           | Incomplete        | D1            | 0.22696     | 2.3316     | 0.22018   | 2.0994  | 0.26449   | 2.4915          | 0.22771    | 48.426     | 0.21755   | 44.764 | 0.23683   | 53.315 |
| MCA           | Incomplete        | H             | 0.36621     | 1.9448     | 0.25456   | 1.7165  | 0.37468   | 2.1255          | 0.31229    | 41.175     | 0.2544    | 36.794 | 0.37705   | 43.401 |
| MCA           | Incomplete        | D2            | 0.46997     | 1.6225     | 0.37743   | 1.424   | 0.50017   | 1.9669          | 0.47474    | 37.888     | 0.37686   | 29.969 | 0.50201   | 41.61  |

Continued on next page

**On-line Table: Continued**

| Parent Artery | CoW Configuration | Feature Point | Flow (mL/s) |            |           |         |           |         | Velocity (cm/s) |            |           |        |           |        |
|---------------|-------------------|---------------|-------------|------------|-----------|---------|-----------|---------|-----------------|------------|-----------|--------|-----------|--------|
|               |                   |               | Median (x)  | Median (y) | Q1 (x)    | Q1 (y)  | Q3 (x)    | Q3 (y)  | Median (x)      | Median (y) | Q1 (x)    | Q1 (y) | Q3 (x)    | Q3 (y) |
| MCA           | Incomplete        | D3            | 0.57372     | 1.4282     | 0.50104   | 1.2477  | 0.62566   | 1.7236  | 0.53718         | 31.984     | 0.4996    | 25.905 | 0.62263   | 35.621 |
| MCA           | Incomplete        | D4            | 0.67748     | 1.2751     | 0.62466   | 1.0241  | 0.7456    | 1.5932  | 0.64962         | 28.301     | 0.62363   | 24.731 | 0.73816   | 31.78  |
| MCA           | Incomplete        | D5            | 0.78123     | 1.0709     | 0.74827   | 0.95065 | 0.8495    | 1.1444  | 0.76989         | 23.768     | 0.74425   | 20.873 | 0.85368   | 26.419 |
| A1            | Complete          | M             | -0.081826   | 0.78548    | -0.11019  | 0.54966 | -0.071529 | 0.88717 | -0.084886       | 19.862     | -0.10172  | 17.446 | -0.075212 | 23.464 |
| A1            | Complete          | S1            | -0.027776   | 1.0112     | -0.035165 | 0.83164 | -0.022683 | 1.1557  | -0.028918       | 26.875     | -0.032807 | 24.61  | -0.022456 | 32.877 |
| A1            | Complete          | S2            | 0           | 1.2427     | 0         | 1.0961  | 0         | 1.44    | 0               | 36.003     | 0         | 30.959 | 0         | 40.407 |
| A1            | Complete          | S3            | 0.03172     | 1.4816     | 0.022494  | 1.3094  | 0.037195  | 1.7361  | 0.03065         | 45.11      | 0.022223  | 37.347 | 0.038515  | 48.972 |
| A1            | Complete          | P             | 0.11795     | 1.7205     | 0.078713  | 1.4804  | 0.15912   | 2.0223  | 0.11388         | 52.014     | 0.079069  | 43.459 | 0.16945   | 58.366 |
| A1            | Complete          | D1            | 0.21685     | 1.4816     | 0.19403   | 1.3094  | 0.25935   | 1.7361  | 0.21609         | 45.11      | 0.19472   | 37.347 | 0.25994   | 48.972 |
| A1            | Complete          | H             | 0.27357     | 1.2427     | 0.24931   | 1.0961  | 0.41745   | 1.44    | 0.27674         | 36.003     | 0.24536   | 30.959 | 0.41592   | 40.407 |
| A1            | Complete          | D2            | 0.39697     | 1.1147     | 0.37811   | 0.96637 | 0.54639   | 1.3354  | 0.39721         | 34.86      | 0.37633   | 27.351 | 0.54768   | 38.18  |
| A1            | Complete          | D3            | 0.53194     | 1.0318     | 0.49386   | 0.8639  | 0.67365   | 1.1783  | 0.52649         | 27.134     | 0.4894    | 24.703 | 0.67932   | 33.675 |
| A1            | Complete          | D4            | 0.66821     | 0.98355    | 0.62428   | 0.7583  | 0.79983   | 1.1166  | 0.66702         | 25.083     | 0.62675   | 24.272 | 0.8052    | 27.986 |
| A1            | Complete          | D5            | 0.80448     | 0.78598    | 0.75355   | 0.55073 | 0.91881   | 0.88751 | 0.80247         | 19.91      | 0.76302   | 17.464 | 0.92569   | 23.475 |
| A1            | Incomplete        | M             | -0.085884   | 0.98191    | -0.098429 | 0.92794 | -0.07714  | 1.239   | -0.097135       | 25.516     | -0.10464  | 18.758 | -0.080781 | 27.228 |
| A1            | Incomplete        | S1            | -0.030196   | 1.234      | -0.034851 | 1.138   | -0.024796 | 1.6403  | -0.032101       | 31.874     | -0.034714 | 24.411 | -0.030208 | 38.925 |
| A1            | Incomplete        | S2            | 0           | 1.5237     | 0         | 1.4489  | 0         | 2.0417  | 0               | 37.956     | 0         | 30.064 | 0         | 51.066 |
| A1            | Incomplete        | S3            | 0.033904    | 1.8391     | 0.026108  | 1.7109  | 0.04664   | 2.4431  | 0.036803        | 43.312     | 0.034644  | 35.695 | 0.04878   | 63.409 |
| A1            | Incomplete        | P             | 0.14773     | 2.218      | 0.13253   | 1.957   | 0.16563   | 2.8444  | 0.14508         | 49.587     | 0.12142   | 41.097 | 0.16601   | 75.752 |
| A1            | Incomplete        | D1            | 0.22429     | 1.8391     | 0.19926   | 1.7109  | 0.28855   | 2.4431  | 0.22411         | 43.312     | 0.19335   | 35.695 | 0.24175   | 63.409 |
| A1            | Incomplete        | H             | 0.3697      | 1.5237     | 0.2339    | 1.4489  | 0.38838   | 2.0417  | 0.34823         | 37.956     | 0.23092   | 30.064 | 0.38492   | 51.066 |
| A1            | Incomplete        | D2            | 0.46737     | 1.3303     | 0.3393    | 1.2587  | 0.49682   | 1.7254  | 0.4619          | 33.672     | 0.32854   | 25.292 | 0.4898    | 45.065 |
| A1            | Incomplete        | D3            | 0.56504     | 1.289      | 0.43611   | 1.2041  | 0.59588   | 1.7481  | 0.56505         | 32.433     | 0.42323   | 24.076 | 0.59731   | 35.073 |
| A1            | Incomplete        | D4            | 0.66272     | 1.4917     | 0.53123   | 1.0604  | 0.69552   | 1.7277  | 0.66267         | 30.953     | 0.61262   | 18.735 | 0.70214   | 40.783 |
| A1            | Incomplete        | D5            | 0.76039     | 0.98173    | 0.62635   | 0.92733 | 0.79669   | 1.2388  | 0.76029         | 25.511     | 0.61262   | 18.735 | 0.80037   | 27.23  |
| A2            | Complete          | M             | -0.16796    | 0.48189    | -0.19305  | 0.37492 | -0.094852 | 0.62597 | -0.1038         | 14.448     | -0.1805   | 13.698 | -0.078808 | 23.437 |
| A2            | Complete          | S1            | -0.093933   | 0.56393    | -0.11319  | 0.45073 | -0.041436 | 0.85479 | -0.042362       | 20.845     | -0.10771  | 17.171 | -0.028446 | 28.39  |
| A2            | Complete          | S2            | 0           | 0.64596    | 0         | 0.52655 | 0         | 1.0836  | 0               | 27.242     | 0         | 20.645 | 0         | 33.343 |
| A2            | Complete          | S3            | 0.025825    | 0.72799    | 0.022463  | 0.60236 | 0.039849  | 1.3124  | 0.025331        | 33.639     | 0.022332  | 24.118 | 0.10675   | 38.296 |
| A2            | Complete          | P             | 0.094192    | 0.81002    | 0.068968  | 0.67817 | 0.14275   | 1.5412  | 0.15717         | 40.036     | 0.083753  | 27.591 | 0.17813   | 43.248 |
| A2            | Complete          | D1            | 0.14178     | 0.72799    | 0.11356   | 0.60236 | 0.21164   | 1.3124  | 0.23325         | 33.639     | 0.13403   | 24.118 | 0.23491   | 38.296 |
| A2            | Complete          | H             | 0.31982     | 0.64596    | 0.24667   | 0.52655 | 0.50951   | 1.0836  | 0.27421         | 27.242     | 0.16721   | 20.645 | 0.49752   | 33.343 |
| A2            | Complete          | D2            | 0.42864     | 0.6364     | 0.35288   | 0.47723 | 0.58155   | 0.79308 | 0.41047         | 20.289     | 0.29642   | 19.771 | 0.57657   | 31.098 |
| A2            | Complete          | D3            | 0.53747     | 0.69201    | 0.4591    | 0.54909 | 0.6536    | 0.74929 | 0.54674         | 17.488     | 0.42564   | 16.648 | 0.65562   | 32.787 |
| A2            | Complete          | D4            | 0.64629     | 0.59211    | 0.56531   | 0.4286  | 0.72564   | 0.69416 | 0.68301         | 19.573     | 0.55485   | 16.607 | 0.73468   | 29.206 |
| A2            | Complete          | D5            | 0.75511     | 0.48185    | 0.67152   | 0.37621 | 0.79768   | 0.62716 | 0.81188         | 14.448     | 0.68222   | 13.698 | 0.81743   | 23.435 |
| A2            | Incomplete        | M             | -0.093485   | 0.60718    | -0.093191 | 0.37621 | 0.79768   | 0.62716 | -0.093191       | 17.778     | -0.093191 | 17.778 | 0.81743   | 23.435 |
| A2            | Incomplete        | S1            | -0.03122    | 0.94722    | -0.030959 | 0.94722 | -0.030959 | 1.7705  | -0.030959       | 27.705     | -0.030959 | 27.705 | 0.81743   | 23.435 |
| A2            | Incomplete        | S2            | 0           | 1.2873     | 0         | 1.2873  | 0         | 1.6273  | 0               | 37.633     | 0         | 30.064 | 0         | 51.066 |
| A2            | Incomplete        | S3            | 0.037057    | 1.6273     | 0.036527  | 1.6273  | 0.036527  | 47.56   | 0.036527        | 47.56      | 0.036527  | 47.56  | 0.81743   | 23.435 |
| A2            | Incomplete        | P             | 0.17128     | 1.9673     | 0.17252   | 1.9673  | 0.17252   | 57.488  | 0.17252         | 57.488     | 0.17252   | 57.488 | 0.81743   | 23.435 |

Continued on next page

**On-line Table: Continued**

| Parent Artery | CoW Configuration | Feature Point | Flow (mL/s) |            |           |         |           | Velocity (cm/s) |            |            |           |        |           |        |
|---------------|-------------------|---------------|-------------|------------|-----------|---------|-----------|-----------------|------------|------------|-----------|--------|-----------|--------|
|               |                   |               | Median (x)  | Median (y) | Q1 (x)    | Q1 (y)  | Q3 (x)    | Q3 (y)          | Median (x) | Median (y) | Q1 (x)    | Q1 (y) | Q3 (x)    | Q3 (y) |
| A2            | Incomplete        | D1            | 0.25387     | 1.6273     | -0.13215  | 0.91299 | -0.075421 | 1.4167          | 0.25566    | 47.56      | -0.13372  | 18.773 | -0.075479 | 26.387 |
| A2            | Incomplete        | H             | 0.31331     | 1.2873     | -0.031709 | 1.6082  | -0.024047 | 1.948           | 0.31594    | 37.633     | -0.032128 | 25.318 | -0.023868 | 36.937 |
| A2            | Incomplete        | D2            | 0.44971     | 1.1099     | 0         | 2.1481  | 0         | 2.4793          | 0.45175    | 32.274     | 0         | 31.863 | 0         | 47.145 |
| A2            | Incomplete        | D3            | 0.5861      | 0.92448    | 0.024879  | 2.6036  | 0.041494  | 3.0106          | 0.58757    | 27.16      | 0.026763  | 38.409 | 0.041781  | 57.353 |
| A2            | Incomplete        | D4            | 0.7225      | 0.87029    | 0.13925   | 3.059   | 0.17331   | 3.6938          | 0.72338    | 25.52      | 0.16235   | 44.954 | 0.17477   | 68.239 |
| A2            | Incomplete        | D5            | 0.8589      | 0.60786    | 0.2108    | 2.6036  | 0.24687   | 3.0106          | 0.85919    | 17.798     | 0.20904   | 38.409 | 0.24607   | 57.353 |
| BA            | Complete          | M             | -0.087775   | 1.253      | 0.25069   | 2.1481  | 0.31064   | 2.4793          | -0.086564  | 23.518     | 0.25051   | 31.863 | 0.30854   | 47.145 |
| BA            | Complete          | S1            | -0.027093   | 1.7667     | 0.34933   | 1.5989  | 0.43947   | 2.236           | -0.02794   | 31.986     | 0.40533   | 29.535 | 0.43825   | 41.616 |
| BA            | Complete          | S2            | 0           | 2.3581     | 0.024879  | 2.6036  | 0.041494  | 3.0106          | 0          | 40.455     | 0.452047  | 23.79  | 0.56797   | 34.594 |
| BA            | Complete          | S3            | 0.026377    | 2.9916     | 0.024879  | 2.6036  | 0.041494  | 3.0106          | 0.026763   | 48.923     | 0.52047   | 28.757 | 0.69768   | 30.197 |
| BA            | Complete          | P             | 0.16103     | 3.5493     | 0.13925   | 3.059   | 0.17331   | 3.6938          | 0.16235    | 57.053     | 0.68145   | 18.775 | 0.82739   | 26.391 |
| BA            | Complete          | D1            | 0.21999     | 2.9916     | 0.2108    | 2.6036  | 0.24687   | 3.0106          | 0.21865    | 48.923     | 0.75192   | 18.775 | 0.82739   | 26.391 |
| BA            | Complete          | H             | 0.27533     | 2.3581     | 0.25069   | 2.1481  | 0.31064   | 2.4793          | 0.27164    | 40.455     | 0.82597   | 14.167 | -0.092921 | 16.608 |
| BA            | Complete          | D2            | 0.40592     | 2.003      | 0.34933   | 1.5989  | 0.43947   | 2.236           | 0.40533    | 38.721     | 0.94379   | 21.073 | -0.029395 | 23.993 |
| BA            | Complete          | D3            | 0.52107     | 1.6032     | 0.45552   | 1.3646  | 0.5683    | 1.7887          | 0.52047    | 32.463     | 0.94379   | 21.073 | -0.029395 | 23.993 |
| BA            | Complete          | D4            | 0.63622     | 1.577      | 0.57316   | 1.1518  | 0.69714   | 1.6763          | 0.63561    | 28.757     | 0.94379   | 21.073 | -0.029395 | 23.993 |
| BA            | Complete          | D5            | 0.75545     | 1.253      | 0.68264   | 0.91266 | 0.82597   | 1.4167          | 0.75592    | 23.533     | 0.94379   | 21.073 | -0.029395 | 23.993 |
| BA            | Incomplete        | M             | -0.096253   | 0.37999    | -0.16528  | 0.37275 | -0.093718 | 0.65137         | -0.097097  | 21.783     | 0         | 25.02  | 0         | 31.377 |
| BA            | Incomplete        | S1            | -0.03268    | 0.58804    | -0.09524  | 0.56545 | -0.029439 | 0.94379         | -0.032643  | 21.073     | 0         | 25.02  | 0         | 31.377 |
| BA            | Incomplete        | S2            | 0           | 0.7961     | 0         | 0.75815 | 0         | 1.2362          | 0          | 28.414     | 0         | 25.02  | 0         | 31.377 |
| BA            | Incomplete        | S3            | 0.029738    | 1.0042     | 0.024531  | 0.95086 | 0.039482  | 1.5286          | 0.02995    | 35.755     | 0.02456   | 31.271 | 0.03893   | 38.762 |
| BA            | Incomplete        | P             | 0.17375     | 1.2122     | 0.087914  | 1.1436  | 0.21457   | 1.8211          | 0.1729     | 43.096     | 0.087373  | 37.522 | 0.21537   | 46.147 |
| BA            | Incomplete        | D1            | 0.27502     | 1.0042     | 0.14004   | 0.95086 | 0.34794   | 1.5286          | 0.27522    | 35.755     | 0.1401    | 31.271 | 0.32568   | 38.762 |
| BA            | Incomplete        | H             | 0.39779     | 0.7961     | 0.1871    | 0.75815 | 0.46954   | 1.2362          | 0.39619    | 28.414     | 0.18671   | 25.02  | 0.46746   | 31.377 |
| BA            | Incomplete        | D2            | 0.51622     | 0.68787    | 0.2888    | 0.62726 | 0.58658   | 1.089           | 0.5148     | 21.783     | 0.28876   | 21.639 | 0.58522   | 26.694 |
| BA            | Incomplete        | D3            | 0.63464     | 0.6103     | 0.3905    | 0.50538 | 0.70362   | 0.96676         | 0.63342    | 21.674     | 0.39081   | 16.943 | 0.70298   | 24.711 |
| BA            | Incomplete        | D4            | 0.75306     | 0.46036    | 0.4922    | 0.42489 | 0.82065   | 0.81383         | 0.75203    | 16.535     | 0.49286   | 14.348 | 0.82073   | 20.374 |
| BA            | Incomplete        | D5            | 0.87149     | 0.38021    | 0.5939    | 0.37282 | 0.93769   | 0.65158         | 0.87065    | 13.739     | 0.59491   | 12.52  | 0.93849   | 16.613 |
| VA            | Complete          | M             | -0.095555   | 1.0941     | -0.09524  | 0.56545 | -0.029439 | 0.94379         | -0.096241  | 12.922     | 0         | 25.02  | 0         | 31.377 |
| VA            | Complete          | S1            | -0.030921   | 1.6296     | 0         | 0.75815 | 0         | 1.2362          | -0.030757  | 17.82      | 0         | 25.02  | 0         | 31.377 |
| VA            | Complete          | S2            | 0           | 2.1652     | 0         | 0.75815 | 0         | 1.2362          | 0          | 22.718     | 0         | 25.02  | 0         | 31.377 |
| VA            | Complete          | S3            | 0.033434    | 2.7007     | 0.024531  | 0.95086 | 0.039482  | 1.5286          | 0.03214    | 27.616     | 0.02456   | 31.271 | 0.03893   | 38.762 |
| VA            | Complete          | P             | 0.12106     | 3.2363     | 0.087914  | 1.1436  | 0.21457   | 1.8211          | 0.10715    | 32.514     | 0.087373  | 37.522 | 0.21537   | 46.147 |
| VA            | Complete          | D1            | 0.21564     | 2.7007     | 0.14004   | 0.95086 | 0.34794   | 1.5286          | 0.19703    | 27.616     | 0.1401    | 31.271 | 0.32568   | 38.762 |
| VA            | Complete          | H             | 0.27856     | 2.1652     | 0.1871    | 0.75815 | 0.46954   | 1.2362          | 0.25881    | 22.718     | 0.18671   | 25.02  | 0.46746   | 31.377 |
| VA            | Complete          | D2            | 0.43927     | 1.7706     | 0.2888    | 0.62726 | 0.58658   | 1.089           | 0.42428    | 18.606     | 0.28876   | 21.639 | 0.58522   | 26.694 |
| VA            | Complete          | D3            | 0.59998     | 1.5039     | 0.3905    | 0.50538 | 0.70362   | 0.96676         | 0.58976    | 16.593     | 0.39081   | 16.943 | 0.70298   | 24.711 |
| VA            | Complete          | D4            | 0.76069     | 1.4348     | 0.4922    | 0.42489 | 0.82065   | 0.81383         | 0.75523    | 15.822     | 0.49286   | 14.348 | 0.82073   | 20.374 |
| VA            | Complete          | D5            | 0.92139     | 1.095      | 0.5939    | 0.37282 | 0.93769   | 0.65158         | 0.92071    | 12.928     | 0.59491   | 12.52  | 0.93849   | 16.613 |
| VA            | Incomplete        | M             | -0.085057   | 0.4053     | -0.09524  | 0.56545 | -0.029439 | 0.94379         | -0.090912  | 8.9875     | 0         | 25.02  | 0         | 31.377 |
| VA            | Incomplete        | S1            | -0.02678    | 0.6381     | -0.09524  | 0.56545 | -0.029439 | 0.94379         | -0.027983  | 13.512     | 0         | 25.02  | 0         | 31.377 |

Continued on next page

**On-line Table: Continued**

| Parent Artery | CoW Configuration | Feature Point | Flow (mL/s) |            |        | Velocity (cm/s) |        |          |        |        |        |
|---------------|-------------------|---------------|-------------|------------|--------|-----------------|--------|----------|--------|--------|--------|
|               |                   |               | Median (x)  | Median (y) | Q3 (x) | Q1 (y)          | Q1 (x) | Q3 (y)   | Q1 (y) | Q3 (x) | Q3 (y) |
| VA            | Incomplete        | S2            | 0           | 0.87089    |        |                 |        | 0        | 18.037 |        |        |
| VA            | Incomplete        | S3            | 0.030728    | 1.1037     |        |                 |        | 0.030562 | 22.562 |        |        |
| VA            | Incomplete        | P             | 0.17152     | 1.3365     |        |                 |        | 0.1633   | 27.087 |        |        |
| VA            | Incomplete        | D1            | 0.24111     | 1.1037     |        |                 |        | 0.2464   | 22.562 |        |        |
| VA            | Incomplete        | H             | 0.27411     | 0.87089    |        |                 |        | 0.2793   | 18.037 |        |        |
| VA            | Incomplete        | D2            | 0.38169     | 0.71101    |        |                 |        | 0.38411  | 14.847 |        |        |
| VA            | Incomplete        | D3            | 0.48926     | 0.53325    |        |                 |        | 0.48893  | 11.369 |        |        |
| VA            | Incomplete        | D4            | 0.59684     | 0.38433    |        |                 |        | 0.59375  | 9.3913 |        |        |
| VA            | Incomplete        | D5            | 0.70442     | 0.40535    |        |                 |        | 0.69856  | 8.9904 |        |        |

**Note:**—Q indicates quartile.
